# Supplementary material
Source: PubMed Central journal article supplement (PMC3232898)
Supplement: supp_193.23.6461_SuppFigures.pdf [file supp_193.23.6461_SuppFigures.pdf]

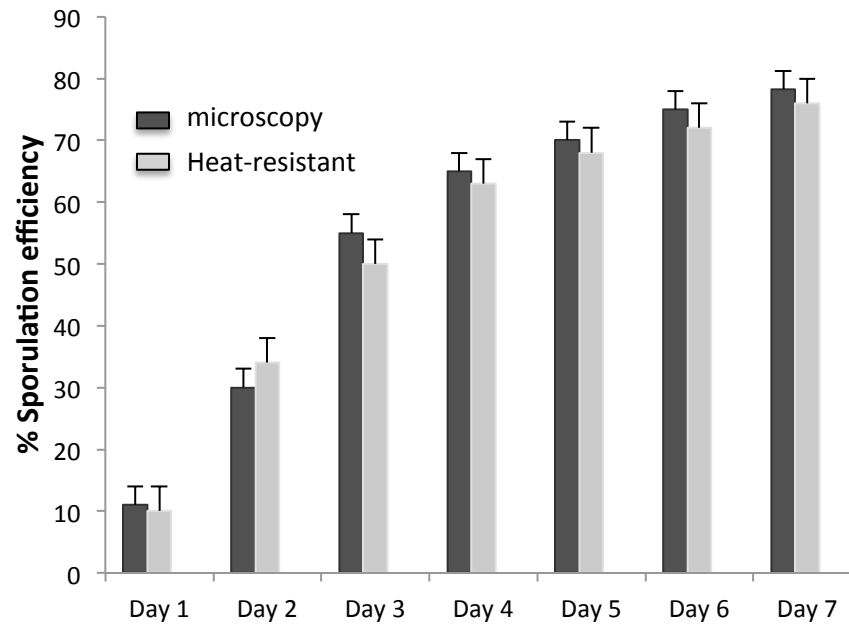

**Supplementary Figure 1: Sporulation of *C. difficile* on solid medium.**

*C. difficile* 630 was grown on agar at 37°C. Each day samples were removed and examined for the number of spores by either phase contrast microscopy using a haemocytometer to count phase bright spores and vegetative cells, or, by heating the spore suspension for 60°C for 20 min and plating for CFU/ml with comparison to untreated CFU/ml.

| Proteins             | Orthologues |             |              |             |             |             |              |             |             |             |             |             |             |              |             |             |
|----------------------|-------------|-------------|--------------|-------------|-------------|-------------|--------------|-------------|-------------|-------------|-------------|-------------|-------------|--------------|-------------|-------------|
|                      | <i>C.d.</i> | <i>B.s.</i> | <i>B.li.</i> | <i>B.a.</i> | <i>B.c.</i> | <i>B.t.</i> | <i>B.cl.</i> | <i>B.h.</i> | <i>G.k.</i> | <i>O.i.</i> | <i>C.p.</i> | <i>C.a.</i> | <i>C.t.</i> | <i>C.th.</i> | <i>C.n.</i> | <i>C.c.</i> |
| CotA                 | +           | -           | -            | -           | -           | -           | -            | -           | -           | -           | -           | -           | -           | -            | -           | -           |
| CotB                 | +           | -           | +            | +           | +           | +           | -            | +           | -           | -           | +           | +           | +           | +            | -           | +           |
| CotCA                | +           | +           | +            | +           | +           | +           | -            | +           | +           | -           | +           | +           | -           | +            | +           | +           |
| CotCB                | +           | +           | +            | +           | +           | +           | +            | +           | +           | +           | +           | +           | +           | +            | +           | -           |
| CotD                 | +           | +           | +            | +           | +           | +           | +            | +           | +           | +           | +           | +           | +           | +            | +           | -           |
| CotE-perox-chitinase | +           | -           | -            | -           | -           | -           | -            | -           | -           | -           | -           | -           | -           | -            | -           | -           |
| CotE-peroxiredoxin   | +           | +           | +            | +           | +           | +           | +            | +           | +           | +           | +           | +           | +           | +            | -           | -           |
| CotE-chitinase       | +           | +           | +            | +           | +           | +           | +            | +           | -           | +           | -           | -           | -           | +            | -           | +           |

Orthologues were identified through BLASTP searches ([www.ncbi.nih.gov](http://www.ncbi.nih.gov)) using proteins sequences against the following genomes:

*B.a.*, *Bacillus anthracis* Sterne

*B.c.*, *B. cereus* ATCC 10987

*B.cl.*, *B. clausii* KSM-K16

*B.h.*, *B. halodurans* C-125

*B.l.*, *B. licheniformis* ATCC 14580

*B.s.*, *B. subtilis* 168

*B.t.*, *B. thuringiensis* serovar konkukian str. 97-27

*C.a.*, *Clostridium acetobutylicum* ATCC 824

*C.c.*, *Clostridium cellulolyticum* H10

*C.d.*, *Clostridium difficile* 630

*C.n.*, *Clostridium novyi* NT

*C.p.*, *Clostridium perfringens* ATCC 13124

*C.t.*, *Clostridium tetani* E88 (asporogeneous)

*C.th.*, *Clostridium thermocellum* ATCC 27405

*G.k.*, *Geobacillus kaustophilus* HTA426

*O.i.*, *Oceanobacillus iheyensis* HTE831

### Supplementary Fig 2: Orthologues of *C. difficile* 630 spore surface proteins CotA-E in other spore formers

The table shows possible orthologues of CotA-E found in *Geobacillus kaustophilus* and *Oceanobacillus iheyensis* as well as other common *Clostridium* and *Bacillus* spore formers. For CotE also shown are orthologues to the individual peroxiredoxin and chitinase domains. Hypothetical proteins are also included.

## A (CotCB)

|     | Mn_Catalase |    |    |    |   |   |   |   |   |   |   |   |   |   |   |   |   |   |   |   |   |   |   |   |   |   |   |   |   |   |   |   |   |   |   |   |   |   |   |   |   |   |   |   |   |   |   |   |   |   |   |   |   |   |   |   |   |   |   |   |   |   |   |   |   |   |   |   |   |   |   |   |   |   |   |   |   |   |   |   |   |   |   |   |   |   |   |   |   |
|-----|-------------|----|----|----|---|---|---|---|---|---|---|---|---|---|---|---|---|---|---|---|---|---|---|---|---|---|---|---|---|---|---|---|---|---|---|---|---|---|---|---|---|---|---|---|---|---|---|---|---|---|---|---|---|---|---|---|---|---|---|---|---|---|---|---|---|---|---|---|---|---|---|---|---|---|---|---|---|---|---|---|---|---|---|---|---|---|---|---|---|
| 1   | MW          | YQ | KT | LE | H | P | V | N | I | R | Q | A | D | P | R | M | A | K | Y | I | M | T | Q | L | G | P | N | G | E | L | A | A | A | T | R | Y | L | Q | Q | R | Y | T | M | P | T | G | K | S | R | A | L | L | T | I | G | T | E | E | M | A | H | V | E | I | I | S | S | V | L | Y | Q | L | I | G | N | C | T | P | E | E | L | K | A |   |   |   |   |   |   |
| 91  | A           | G  | L  | G  | S | N | Y | A | N | F | G | H | G | L | Q | P | V | D | S | N | G | V | N | F | T | T | S | Y | I | N | V | F | G | D | S | V | T | D | L | H | E | D | M | A | E | Q | K | A | L | A | T | Y | Y | Q | L | I | N | L | T | D | D | P | D | L | K | D | I | L | R | F | L | G | E | R | E | V | V | H | Y | Q | R | F | G | E | A | L | M | D | V |
| 181 | Y           | E  | F  | T  | E | C | K | H | Q | F | * |   |   |   |   |   |   |   |   |   |   |   |   |   |   |   |   |   |   |   |   |   |   |   |   |   |   |   |   |   |   |   |   |   |   |   |   |   |   |   |   |   |   |   |   |   |   |   |   |   |   |   |   |   |   |   |   |   |   |   |   |   |   |   |   |   |   |   |   |   |   |   |   |   |   |   |   |   |   |

## B (CotD)

|     | Ferritin_like superfamily |    |    |   |   |   |   |   |   |   |   |   |   |   |   |   |   |   |   |   |   |   |   |   |   |   |   |   |   |   |   |   |   |   |   |   |   |   |   |   |   |   |   |   |   |   |   |   |   |   |   |   |   |   |   |   |   |   |   |   |   |   |   |   |   |   |   |   |   |   |   |   |   |   |   |   |   |   |   |   |   |   |   |   |   |   |   |
|-----|---------------------------|----|----|---|---|---|---|---|---|---|---|---|---|---|---|---|---|---|---|---|---|---|---|---|---|---|---|---|---|---|---|---|---|---|---|---|---|---|---|---|---|---|---|---|---|---|---|---|---|---|---|---|---|---|---|---|---|---|---|---|---|---|---|---|---|---|---|---|---|---|---|---|---|---|---|---|---|---|---|---|---|---|---|---|---|---|---|
| 1   | MW                        | YQ | KT | I | Q | H | P | V | N | I | K | T | C | D | P | R | M | A | K | F | L | I | T | Q | F | G | P | N | G | E | L | A | A | S | L | R | Y | L | S | Q | R | Y | T | M | P | T | G | K | S | T | G | N | M | R | A | L | L | T | I | G | T | E | E | L | A | H | V | E | L | I | C | T | M | V | Y | Q | L | T | S | D | A | S | E | E | L | K | A |
| 91  | A                         | G  | L  | G | S | N | Y | A | Q | N | G | Y | G | I | P | T | D | S | N | G | V | P | D | V | R | P | I | A | V | M | S | N | P | V | T | D | L | H | E | D | M | A | E | Q | K | A | L | A | T | Y | Y | Q | L | I | N | L | T | D | D | V | D | V | I | D | V | L | K | F | L | G | Q | R | E | I | I | H | Y | Q | R | F | G | E | A | L | M | D | A |
| 181 | Y                         | E  | L  | E | S | Q | K | M | F | * |   |   |   |   |   |   |   |   |   |   |   |   |   |   |   |   |   |   |   |   |   |   |   |   |   |   |   |   |   |   |   |   |   |   |   |   |   |   |   |   |   |   |   |   |   |   |   |   |   |   |   |   |   |   |   |   |   |   |   |   |   |   |   |   |   |   |   |   |   |   |   |   |   |   |   |   |   |

## C (CotCB vs CotD alignment)

|                              |       |     |     |     |     |     |     |     |     |      |    |     |   |   |   |   |   |   |   |   |   |   |   |   |   |   |   |   |   |   |   |   |   |   |   |   |   |   |   |   |   |   |   |   |   |   |   |   |   |   |   |   |   |   |   |   |   |   |   |   |   |   |   |   |   |   |   |   |   |   |   |   |   |   |   |   |   |   |   |
|------------------------------|-------|-----|-----|-----|-----|-----|-----|-----|-----|------|----|-----|---|---|---|---|---|---|---|---|---|---|---|---|---|---|---|---|---|---|---|---|---|---|---|---|---|---|---|---|---|---|---|---|---|---|---|---|---|---|---|---|---|---|---|---|---|---|---|---|---|---|---|---|---|---|---|---|---|---|---|---|---|---|---|---|---|---|---|
|                              | (1)   | 1   | 10  | 20  | 30  | 40  | 50  | 60  | 79  |      |    |     |   |   |   |   |   |   |   |   |   |   |   |   |   |   |   |   |   |   |   |   |   |   |   |   |   |   |   |   |   |   |   |   |   |   |   |   |   |   |   |   |   |   |   |   |   |   |   |   |   |   |   |   |   |   |   |   |   |   |   |   |   |   |   |   |   |   |   |
| CotCB <i>C.difficile</i> 630 | (1)   | MW  | YQ  | KT  | LE  | HP  | VNI | RQA | DPR | MAKY | IM | TQL | G | P | N | G | E | L | A | A | A | T | R | Y | L | Q | Q | R | Y | T | M | P | T | G | K | S | R | A | L | L | T | D | I | G | T | E | E | M | A | H | V | E | I | I | S | S | V | L | Y | Q | L |   |   |   |   |   |   |   |   |   |   |   |   |   |   |   |   |   |   |
| CotD <i>C.difficile</i> 630  | (1)   | MW  | YQ  | KT  | I   | Q   | HP  | VNI | K   | T    | C  | D   | P | R | M | A | K | F | L | I | T | Q | F | G | P | N | G | E | L | A | A | S | L | R | Y | L | S | Q | R | Y | T | M | P | T | G | N | M | R | A | L | L | T | D | I | G | T | E | E | L | A | H | V | E | L | I | C | T | M | V | Y | Q | L |   |   |   |   |   |   |   |
| Consensus                    | (1)   | MW  | YQ  | KT  | I   | HP  | VNI | K   | DPR | MAK  | F  | I   | T | Q | F | G | P | N | G | E | L | A | A | A | R | Y | L | S | Q | R | Y | T | M | P | T | G | N | M | R | A | L | L | T | D | I | G | T | E | E | L | A | H | V | E | I | I | S | M | L | Y | Q | L |   |   |   |   |   |   |   |   |   |   |   |   |   |   |   |   |   |
|                              | (80)  | 80  | 90  | 100 | 110 | 120 | 130 | 140 | 158 |      |    |     |   |   |   |   |   |   |   |   |   |   |   |   |   |   |   |   |   |   |   |   |   |   |   |   |   |   |   |   |   |   |   |   |   |   |   |   |   |   |   |   |   |   |   |   |   |   |   |   |   |   |   |   |   |   |   |   |   |   |   |   |   |   |   |   |   |   |   |
| CotCB <i>C.difficile</i> 630 | (80)  | I   | G   | N   | C   | T   | P   | E   | E   | L    | K  | A   | A | G | L | G | S | N | Y | A | N | F | G | H | G | L | Q | P | V | D | S | N | G | V | N | F | T | T | S | I | N | V | F | G | D | S | V | T | D | L | H | E | D | M | A | E | Q | K | A | L | A | T | Y | Y | Q | L | I | N | L | T | D | D | P | D | L | K | D | I |   |
| CotD <i>C.difficile</i> 630  | (80)  | T   | S   | D   | A   | S   | P   | E   | E   | L    | K  | A   | A | G | L | G | S | N | Y | A | N | F | G | H | G | L | Q | P | V | D | S | N | G | V | N | F | D | V | R | P | I | A | V | M | S | N | P | V | T | D | L | H | E | D | M | A | E | Q | K | A | L | A | T | Y | Y | Q | L | I | N | L | T | D | D | V | D | V | I | D | V |
| Consensus                    | (80)  | S   | P   | E   | E   | L   | K   | A   | A   | G    | L  | G   | S | N | Y | A | N | F | G | H | G | I | P | D | S | N | G | V | F | I | V | V | T | D | L | H | E | D | M | A | E | Q | K | A | L | A | T | Y | Y | Q | L | I | N | L | T | D | D | D | L | D | I |   |   |   |   |   |   |   |   |   |   |   |   |   |   |   |   |   |   |
|                              | (159) | 159 | 170 | 180 | 191 |     |     |     |     |      |    |     |   |   |   |   |   |   |   |   |   |   |   |   |   |   |   |   |   |   |   |   |   |   |   |   |   |   |   |   |   |   |   |   |   |   |   |   |   |   |   |   |   |   |   |   |   |   |   |   |   |   |   |   |   |   |   |   |   |   |   |   |   |   |   |   |   |   |   |
| CotCB <i>C.difficile</i> 630 | (159) | L   | R   | F   | L   | G   | R   | E   | R   | E    | V  | V   | H | Y | Q | R | F | G | E | A | L | M | D | V | Y | E | F | T | E | C | K | H | Q | F | - |   |   |   |   |   |   |   |   |   |   |   |   |   |   |   |   |   |   |   |   |   |   |   |   |   |   |   |   |   |   |   |   |   |   |   |   |   |   |   |   |   |   |   |   |
| CotD <i>C.difficile</i> 630  | (159) | L   | K   | F   | L   | G   | Q   | R   | E   | I    | I  | H   | Y | Q | R | F | G | E | A | L | M | D | A | Y | E | L | E | S | Q | K | M | F | - |   |   |   |   |   |   |   |   |   |   |   |   |   |   |   |   |   |   |   |   |   |   |   |   |   |   |   |   |   |   |   |   |   |   |   |   |   |   |   |   |   |   |   |   |   |   |
| Consensus                    | (159) | L   | K   | F   | L   | G   | R   | E   | I   | I    | H  | Y   | Q | R | F | G | E | A | L | M | D | Y | E | E | - | - | - |   |   |   |   |   |   |   |   |   |   |   |   |   |   |   |   |   |   |   |   |   |   |   |   |   |   |   |   |   |   |   |   |   |   |   |   |   |   |   |   |   |   |   |   |   |   |   |   |   |   |   |   |

■ = identical

■ = weak similarity

### Supplementary Fig 3: CotCB and CotD.

**Panel A** shows the entire CotCB polypeptide and its similarity with the manganese catalases (a family of ferritin-like diron enzymes). Residues involved in forming the dimanganese centre are indicated (\*). **Panel B** shows the homology of CotD with the ferritin-like family of catalases and amino acids involved in forming the dinuclear metal binding motif (\*). **Panel C** shows the amino acid sequence homology between CotCB and CotD which share consensus and identity positions at 80.6% and 70.2% respectively.

```

                                PRX_1cys
1  VIYMPNLPSL GSKAPDFKAN TTNGPIRLSD YKGNWIVLFS HPGDFTPVCT TEFLCFAYK DEFKKRNTTEL IGLSVDSNSS HLAWMYNISL
-----*-----*-----*-----*-----*-----*-----*-----*-----*-----*-----*-----*-----*-----*-----*-----*
                                PRX_1cys
91 LTGVEIPFPI IEDRDMRIAK LYGMISKPMS DTSTVRSVFI IDNNQILRTI LYYPLTTGRN IPEILRIVDA LQTSDRDNIV TPANWFPGMP
-----*-----*-----*-----*-----*-----*-----*-----*-----*-----*-----*-----*-----*-----*-----*-----*
                                PRX_1cys
181 VILPYPKNYK ELKNRVNSCN KKYS CMDWYL CFVPDNYNDE EVSKKIDNTC SWKKEHTKNI ENECNCEHEH HDYLNKALDC KQEHKTDIKD
271 DCNHEKKHTK NTKVHNSKQ DKFKDKSCDE MNFNYDKDES CDKINSSYNK EDSSYEDFYK HNYKNYDYTS EKNTKKIAMK TLKDSKKLVR
-----*-----*-----*-----*-----*-----*-----*-----*-----*-----*-----*-----*-----*-----*-----*-----*
                                                                GH18_Chitinase
361 PQITDPYNPI VENANCPDIN PIVA EYVLGN PTNVDAQLLD AVIFAFAEID QSGNLFIPYP RFLNQLLALK GEKPSLKVIV AIGGWGAEGF
-----*-----*-----*-----*-----*-----*-----*-----*-----*-----*-----*-----*-----*-----*-----*-----*
                                                                GH18_Chitinase
451 SDAALTPTS R YNFARQVNQM INEYALDGD IDWEYPGSSA SGITSRPQDR ENFTLLLTAI RDVIGDDKWL SVAGTGDRGY INSSAEIDKI
-----*-----*-----*-----*-----*-----*-----*-----*-----*-----*-----*-----*-----*-----*-----*-----*
                                                                GH18_Chitinase
541 APIIDYFNLM SYDFTAGETG PNGRKHQANL FSDLSLPGY SVDAMVRNLE NAGMPSEKIL LGIPFYGR LG ATITRTYDEL RRDYINKNGY
-----*-----*-----*-----*-----*-----*-----*-----*-----*-----*-----*-----*-----*-----*-----*-----*
                                                                GH18_Chitinase
631 EYRFDNTAQV PYLVKDG DFA MSYDDALSIF LKTQYVLRNC LGGVFSWTST YDQANILART MSIGINDPEV LKEELEG IYG QF*
-----*-----*-----*-----*-----*-----*-----*-----*-----*-----*-----*-----*-----*-----*-----*-----*

```

-----\*-----\*-----\*-----\*-----\*-----\*-----\*-----\*-----\*-----\*-----\*-----\*-----\*-----\*-----\* = Peroxiredoxin Domain

-----\*-----\*-----\*-----\*-----\*-----\*-----\*-----\*-----\*-----\*-----\*-----\*-----\*-----\*-----\* = Chitinase Domain

\* = amino acids involved in catalytic site (chitinase domain)

\* = amino acids forming catalytic triad (peroxiredoxin domain)

#### Supplementary Fig 4: CotE.

Figure shows the entire CotE polypeptide and its amino-terminal 1-cys-peroxiredoxin and carboxy-terminal chitinase domains. Active site residues are indicated.
