# Supplementary material
Source: PubMed Central journal article supplement (PMC3232898)
Supplement: supp_193.23.6461_SuppTable1.pdf [file supp_193.23.6461_SuppTable1.pdf]

## Supplementary Method 1: pET28b cloning

### PCR primers

| Primer              | Direction | Sequence <sup>1</sup>                               | Res. site |
|---------------------|-----------|-----------------------------------------------------|-----------|
| <b><i>cotA</i></b>  |           |                                                     |           |
| CotA-NcoI-F         | forward   | GATCC <i>ATGGCTGTGG</i> AAAATAATAAATG               | NcoI      |
| CotA-XhoI-R         | reverse   | ATCCTCGAGTGCAATATAATCTATAGAATCTACA<br>CATA <i>C</i> | XhoI      |
| <b><i>cotB</i></b>  |           |                                                     |           |
| CotB-NcoI-F         | forward   | GATCC <i>ATGGCTATAG</i> ATAATCAAAAATATG             | NcoI      |
| CotB-XhoI-R         | reverse   | ATCCTCGAGCATGTTTTTATAACTCTC                         | XhoI      |
| <b><i>cotC</i></b>  |           |                                                     |           |
| CotC-NcoI-F         | forward   | GATCC <i>ATGGCTTGG</i> ATTTATCAAAAAAC               | NcoI      |
| CotC-XhoI-R         | reverse   | ATCCTCGAGAAACTGATGCTTGCACTC                         | XhoI      |
| <b><i>cotD</i></b>  |           |                                                     |           |
| CotD-NcoI-F         | forward   | GATCC <i>ATGGCTTGG</i> ATATATCAGAAAAC               | NcoI      |
| CotD-XhoI-R         | reverse   | ATCCTCGAGGAACATTTTTTGAGATTC                         | XhoI      |
| <b><i>cotEΔ</i></b> |           |                                                     |           |
| CotEC-NcoI-F        | forward   | GATCC <i>ATGGCTCCA</i> ATTGTAGCAG                   | NcoI      |
| CotEC-XhoI-R        | reverse   | ATCCTCGAGGAATTGCCATAAATAC                           | XhoI      |

<sup>1</sup>5'-3', restriction site is in italics

### Construction of pET expression vectors.

pET28b expression vectors that express the *cot* gene ORFs were constructed by amplifying the respective DNA by PCR from *C. difficile* 630 chromosomal DNA and ligating to cleaved pET28b using the forward and reverse primers shown above.
